# Supplementary material
Source: PubMed Central journal article supplement (PMC3707425)

### **Supplemental Table 1: Severity Scores Assigned on Admission**

### **Supplemental Table 2: Sensitivities and specificities of the different cytokines in predicting clinical outcomes**

### **Supplemental Figure: Time to diarrhea resolution in patients with and without immunosuppression.**

A. In non-immunosuppressed patients: Time to diarrhea resolution is more prolonged in patients with high IL-8 mRNA ( $\Delta\text{CT IL-8 mRNA} > 0\text{m}$ ) at diagnosis (IL-8 +, green line) (median 12 days) compared to those with low IL-8 mRNA levels (IL-8 -, blue line) (median 3 days).

B. In immunosuppressed patients: Time to diarrhea resolution does not differ between patients with high fecal IL-8 mRNA at diagnosis (IL-8 +, red line) (median 5 days) and those with low IL-8 mRNA levels (IL-8 -, orange line) (median 4 days).

+ represents censored values. p represents the p value of the Log Rank (Mantel-Cox) test.

\*represents  $p < 0.05$

**Supplemental Table 1: Severity Scores Assigned on Admission**

|                                                                            | Points assigned                      |            |            |
|----------------------------------------------------------------------------|--------------------------------------|------------|------------|
|                                                                            | HINES VA [16]                        | UPMC1 [14] | CSI [13]   |
| Fever > 38°C                                                               | 1                                    |            |            |
| Ileus (clinical or radiographic)                                           | 1                                    |            |            |
| Systolic blood pressure < 100mmHg                                          | 1                                    |            |            |
| 15 000 < WBC < 30 000 (cells/μL)                                           | 1                                    |            |            |
| WBC >30 000 cells/μL                                                       | 2                                    |            |            |
| CT scan findings (colonic wall thickening,<br>colonic dilatation, ascites) | 1 for 1 finding<br>2 for ≥2 findings |            |            |
| Abdominal Pain                                                             |                                      | 1          |            |
| WBC >20 000 or <1 500 (cells/μL)                                           |                                      | 1          |            |
| Bowel wall thickening, ascites or ileus                                    |                                      | 1          |            |
| Malignancy                                                                 |                                      |            | 1          |
| WBC >20 000 cells/μL                                                       |                                      |            | 1          |
| Blood albumin < 3 g/dL                                                     |                                      |            | 1          |
| Blood creatinine >1.5 times baseline                                       |                                      |            | 1          |
| <b>Disease is considered severe if total points</b>                        | <b>≥ 3</b>                           | <b>≥ 2</b> | <b>≥ 2</b> |

**Supplemental Table 2: Sensitivities and specificities of the different cytokines in predicting clinical outcomes.**

| <b>Biomarkers</b>                        | <b>Diarrhea persistent 5 days after initiation of CDI therapy</b> |                    | <b>Treatment with vancomycin</b> |                    | <b>Severe disease (ICU admission, toxic megacolon, colectomy or death)</b> |                    |
|------------------------------------------|-------------------------------------------------------------------|--------------------|----------------------------------|--------------------|----------------------------------------------------------------------------|--------------------|
|                                          | <b>Sensitivity</b>                                                | <b>Specificity</b> | <b>Sensitivity</b>               | <b>Specificity</b> | <b>Sensitivity</b>                                                         | <b>Specificity</b> |
| CXCL-5 mRNA<br>$\Delta$ CT > 0           | 0.43                                                              | 0.84               | 0.45                             | 0.82               | 0.40                                                                       | 0.70               |
| IL-8 mRNA<br>$\Delta$ CT > 0             | 0.75                                                              | 0.5                | 0.81                             | 0.53               | 0.8                                                                        | 0.4                |
| IL-8 protein<br>>0.75 ng/mL              | 0.61                                                              | 0.59               | 0.63                             | 0.58               | 0.45                                                                       | 0.48               |
| Lactoferrin protein<br>> 7.25 $\mu$ g/mL | 0.67                                                              | 0.43               | 0.69                             | 0.45               | 0.73                                                                       | 0.41               |
| HINES VA<br>Severe if $\geq$ 3           | 0.14                                                              | 0.91               | 0.17                             | 0.94               | 0.45                                                                       | 0.93               |
| UPMC1<br>Severe if $\geq$ 2              | 0.4                                                               | 0.8                | 0.38                             | 0.78               | 0.54                                                                       | 0.74               |
| CSI<br>Severe if $\geq$ 2                | 0.29                                                              | 0.78               | 0.31                             | 0.82               | 0.54                                                                       | 0.8                |

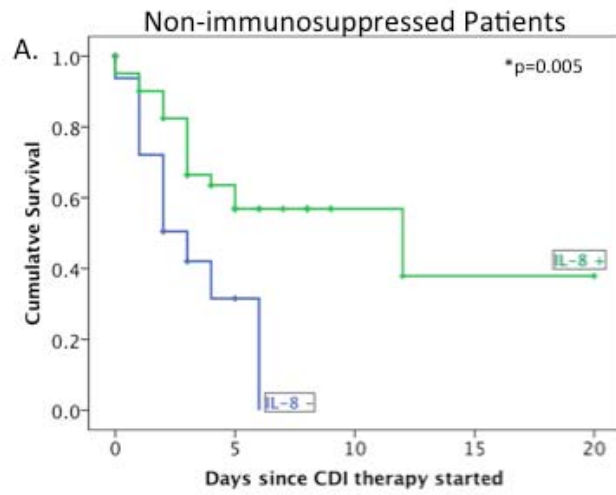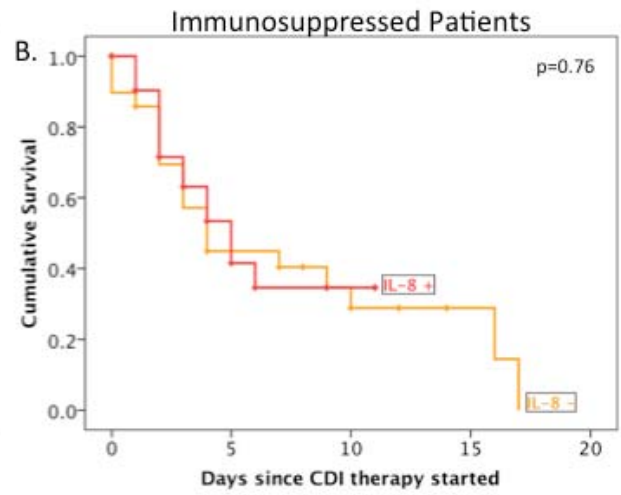

Supplement: supp_cit147_cit147supp.pdf [file supp_cit147_cit147supp.pdf]
